# Supplementary material for: RpoS is a pleiotropic regulator of motility, biofilm formation, exoenzymes, siderophore and prodigiosin production, and trade-off during prolonged stationary phase in Serratia marcescens
Source: PubMed Central journal article supplement (PMC7266296; doi:10.1371/journal.pone.0232549), 2020-06-02
Supplement: pone.0232549.s001.pdf [file pone.0232549.s001.pdf]

1 **S1 Table. Primers used in this study.**

| <b>Primers<sup>a</sup></b>      | <b>Sequence (5' -3')</b>       | <b>Reference or source</b> |
|---------------------------------|--------------------------------|----------------------------|
| <b>For <i>rpoS</i> deletion</b> |                                |                            |
| F-rpoS-U1                       | GGAATTCAGGTGGGAATAAGGGTGTC     | This study                 |
| F-rpoS-D1                       | AAGCGGAAGCAAATCGTTCTCGCTGGTCTC | This study                 |
| F-rpoS-U2                       | AGAACGATTGCTTCCGCTTCTCCAC      | This study                 |
| F-rpoS-D2                       | CAAGCTTGCGTCAAGCCAATCTCC       | This study                 |
| F-rpoS-W                        | CAGCACCGTCAGCAACA              | This study                 |
| R-rpoS-W                        | CGTCAAGCCAATCTCCC              | This study                 |
| F-rpoS-c                        | GGAATTCCGCGTAGTGATGCAGGCAAC    | This study                 |
| R-rpoS-c                        | CAAGCTTTTATTTCGCGGAACAGCGCC    | This study                 |
| <b>For RT-qPCR</b>              |                                |                            |
| RT-16s-F                        | CGAACCGCTGGCAACAA              | This study                 |
| RT-16s-R                        | ACGCGAAGAACCTTACCTACTCT        | This study                 |
| RT-pigA-F                       | ATGGCTTTATGGGCGTGTC            | This study                 |
| RT-pigA-R                       | TGAAGGTCAGTTCGCTCCAC           | This study                 |
| RT-luxS-F                       | GCTGAAAGTGACCGACCAGC           | This study                 |
| RT-luxS-R                       | CGCCGTTATCCAGAATGTGC           | This study                 |
| RT-fliC-F                       | CTGGCTACCCTGGACAAAGC           | This study                 |
| RT-fliC-R                       | GGATACGGGACTGAGAAGCG           | This study                 |
| RT-flhD-F                       | CCGCAATGTTTCGCCTG              | This study                 |
| RT-flhD-R                       | GGCGTTCGATGGTCTGGC             | This study                 |
| RT-ompC-F                       | AACGGGCTTCACTATTTCTCCA         | This study                 |
| RT-ompC-R                       | TTCAGCGTGGTTCAGGTTTCG          | This study                 |
| RT-ompF1-F                      | ACCTATGTTTCGTTTCGGCTTCA        | This study                 |
| RT-ompF1-R                      | GTGCCCTGAGATTCGGAGTG           | This study                 |
| RT-ompF2-F                      | ACCAGGGCAAGAACGAAAAC           | This study                 |
| RT-ompF2-R                      | GGTGCGGTTGGAAGAAGC             | This study                 |

2 <sup>a</sup> F, forward primer; R, reverse primer.

3
