# Supplementary material for: RpoS is a pleiotropic regulator of motility, biofilm formation, exoenzymes, siderophore and prodigiosin production, and trade-off during prolonged stationary phase in Serratia marcescens
Source: PubMed Central journal article supplement (PMC7266296; doi:10.1371/journal.pone.0232549), 2020-06-02
Supplement: pone.0232549.s002.pdf [file pone.0232549.s002.pdf]

4 **S2 Table. General genome features of *S. marcescens* strains 1912768R, 1912768WR and 1912768W.**

| Genome feature                      | Value    |           |          |
|-------------------------------------|----------|-----------|----------|
|                                     | 1912768R | 1912768WR | 1912768W |
| Gene number                         | 4927     | 4998      | 4997     |
| No. of all scaffolds                | 1        | 48        | 39       |
| Bases in all scaffolds              | 5117289  | 5075193   | 5081421  |
| Gene total length (bp)              | 4478904  | 4422783   | 4450470  |
| Gene average length (bp)            | 909.05   | 884.91    | 890.63   |
| Gene density (kb)                   | 0.96     | 0.98      | 0.98     |
| GC content in gene region (%)       | 61.20    | 61.25     | 61.24    |
| Gene/Genome (%)                     | 87.52    | 87.15     | 87.58    |
| Intergenic region length (bp)       | 638385   | 652410    | 630951   |
| GC content in intergenic region (%) | 49.60    | 49.88     | 49.53    |
| Intergenic length/Genome (%)        | 12.48    | 12.85     | 12.42    |

5
